# Supplementary material
Source: PubMed Central journal article supplement (PMC4243057)

**A**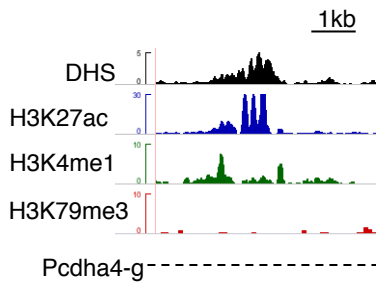**B**

|                                  | OR enhancers | MOE enhancers |
|----------------------------------|--------------|---------------|
| DHS                              | 634          | 25,562        |
| H3K4me1                          | 1,080        | 71,552        |
| H3K27ac                          | 941          | 56,760        |
| Intersect DHS<br>H3K27ac/H3K4me1 | 69           | 10,095        |
| Subtract cerebellar              | <b>35</b>    | <b>4750</b>   |
| Intersect H3K79me3               | 23           | 126           |

**C**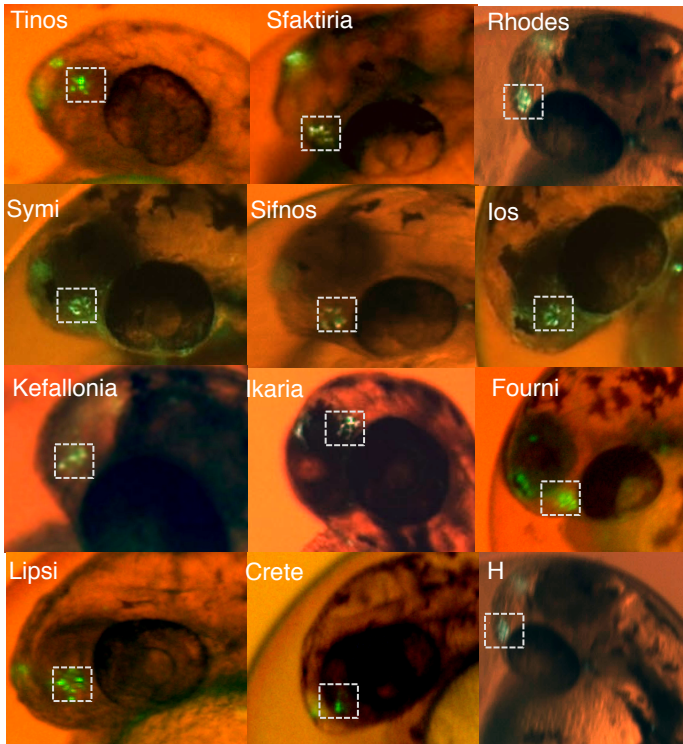**D**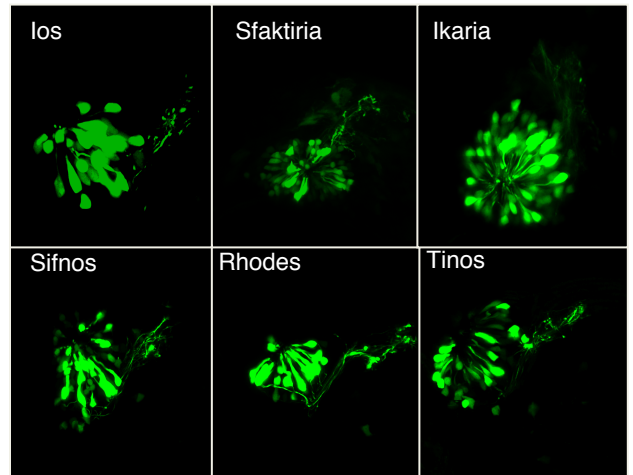**E**

H3K79me3

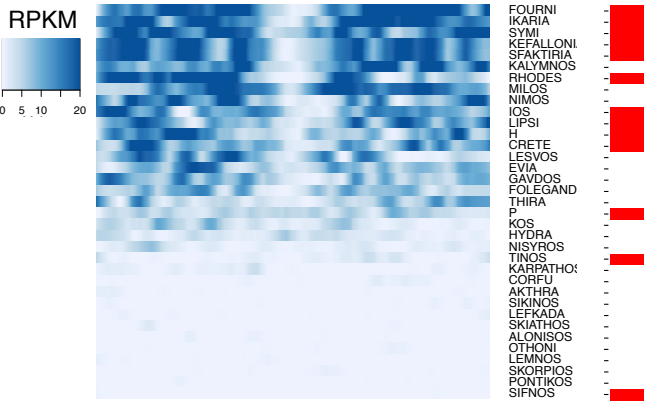**F**

H3K4me1

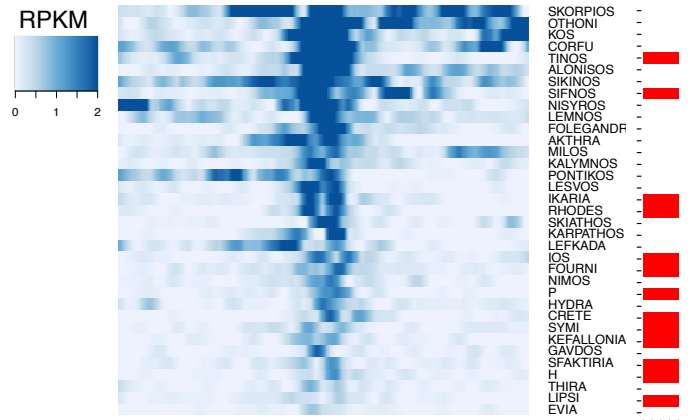

Supplement: NIHMS631164-supplement-4.pdf [file NIHMS631164-supplement-4.pdf]
