# Supplementary material
Source: PubMed Central journal article supplement (PMC4243057)
Supplement: NIHMS631164-supplement-6.pdf [file NIHMS631164-supplement-6.pdf]

**A**

olfr1507 DNA Sfaktiria DNA GFP protein

olfr1507iresGFP +/-

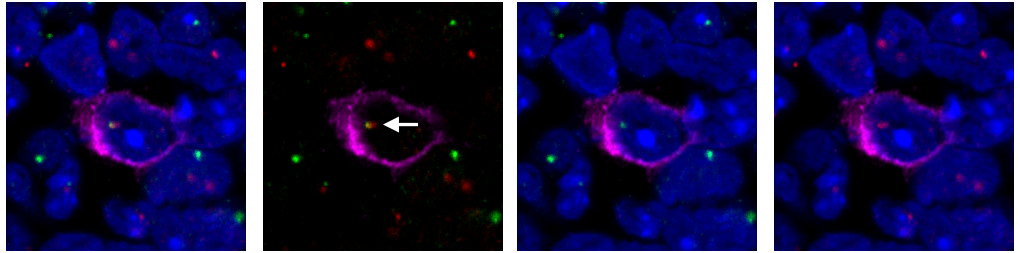**B**

olfr1507+ 4C library

olfr1507- 4C library

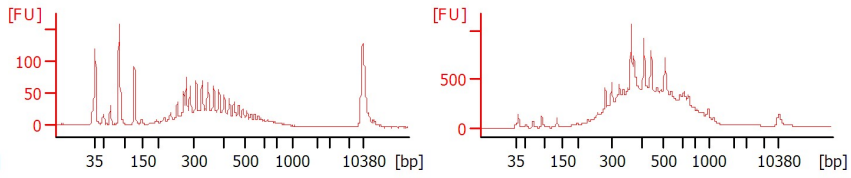**C**

Chr11

SYMI

2kb

olfr1507+ 4C

3000

0

3000

olfr1507- 4C

0

Olf1377

Olf151

**D**

Chr6

SFAKTIRIA

2kb

olfr1507+ 4C

3000

0

3000

olfr1507- 4C

0

Olf448

**E**

Chr11

CRETE

2kb

olfr1507+ 4C

3000

0

3000

olfr1507- 4C

0

Olf139
