# Supplementary material
Source: PubMed Central journal article supplement (PMC4243057)

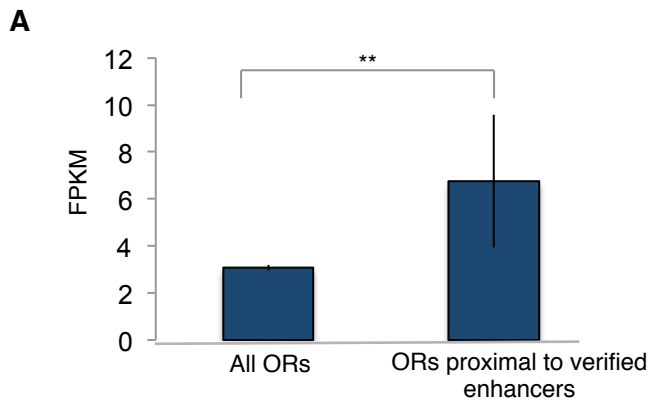

**B**

| LACZ+ FOUNDERS  |     |
|-----------------|-----|
| H-lacZ          | 2/5 |
| Sfaktiria-lacZ  | 2/5 |
| Kefallonia-lacZ | 1/3 |
| Lipsi-lacZ      | 2/5 |

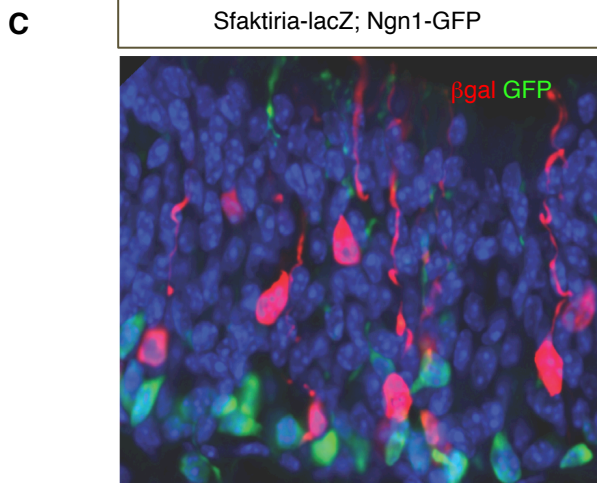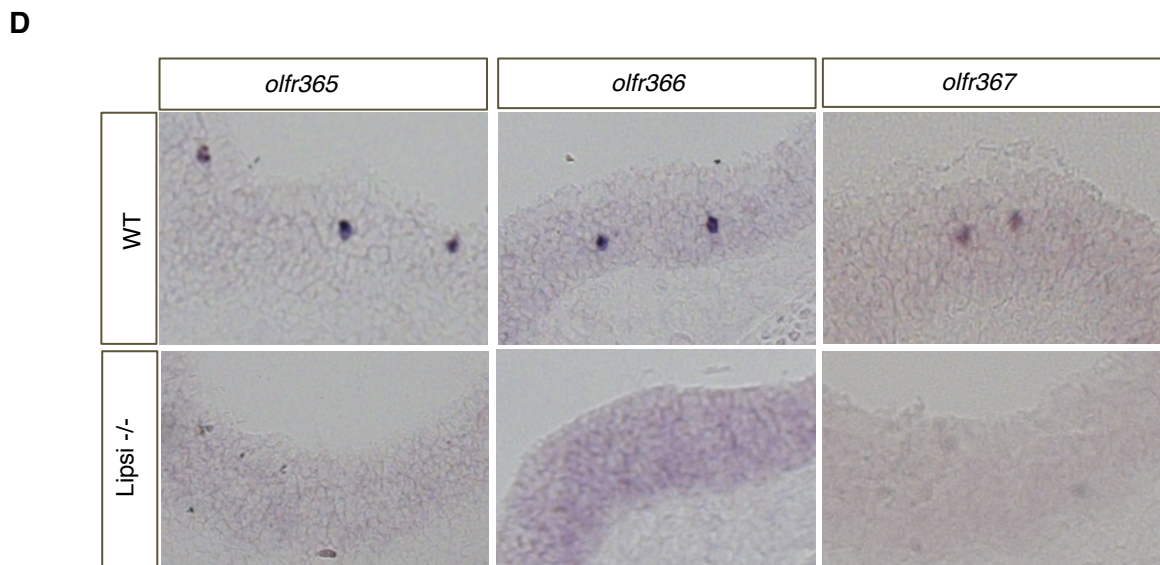

Supplement: NIHMS631164-supplement-5.pdf [file NIHMS631164-supplement-5.pdf]

A

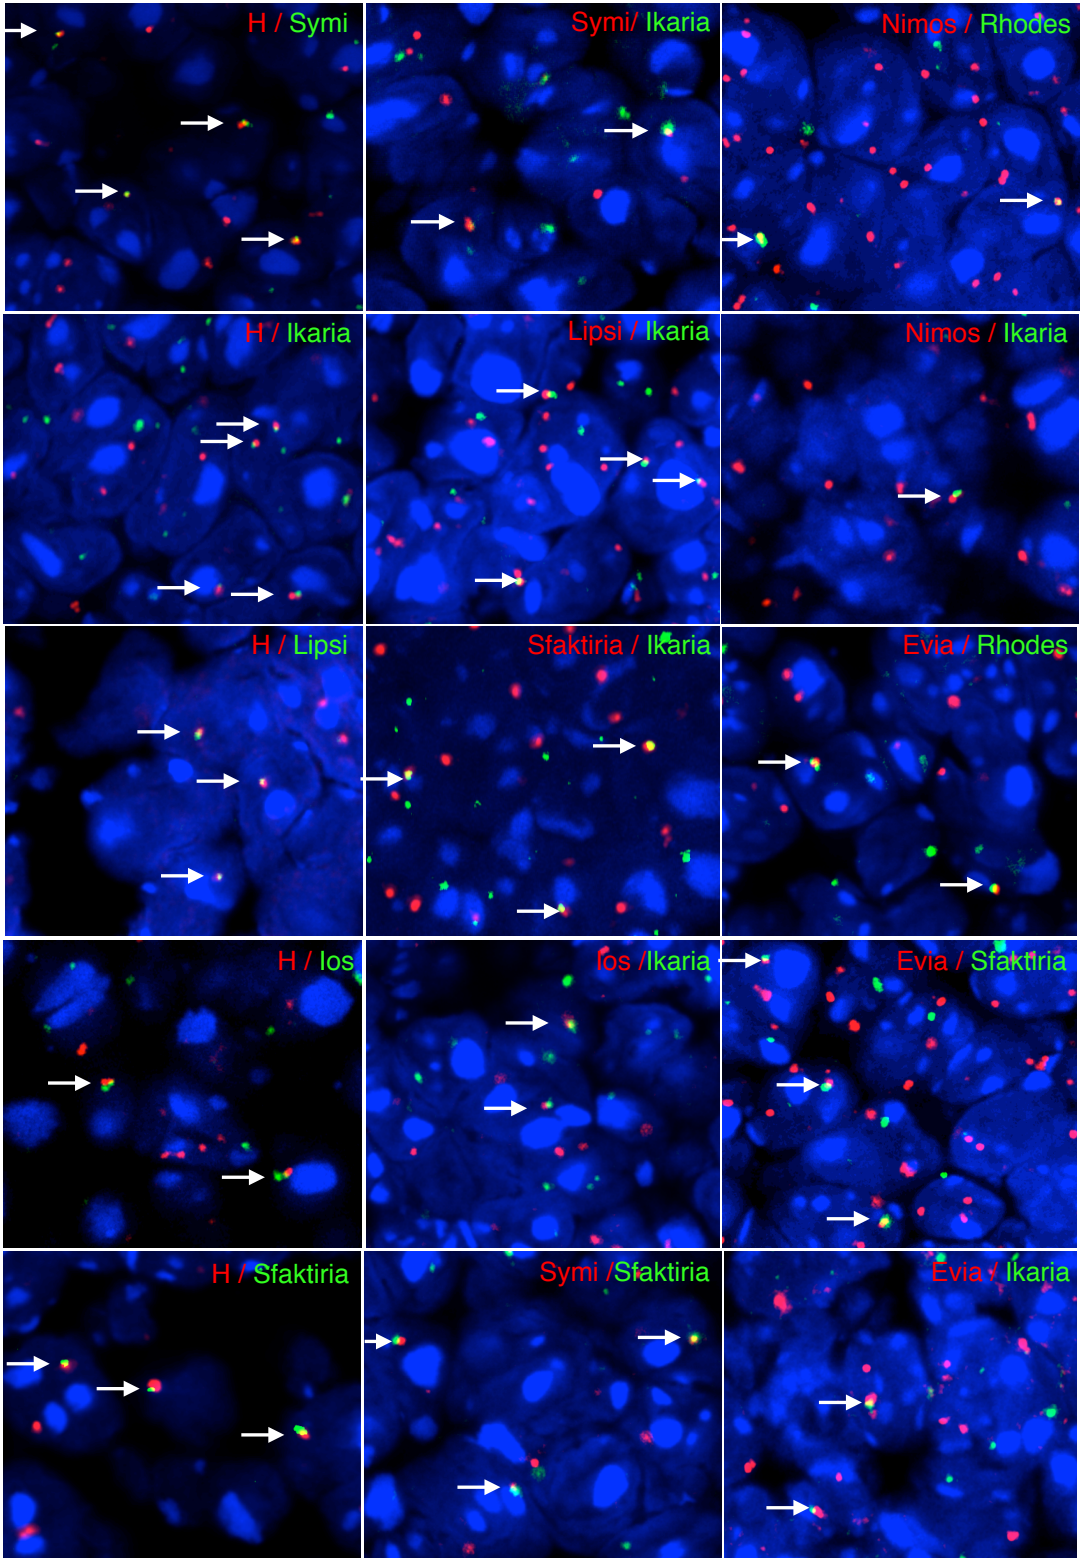

Supplement: NIHMS631164-supplement-7.pdf [file NIHMS631164-supplement-7.pdf]

**A**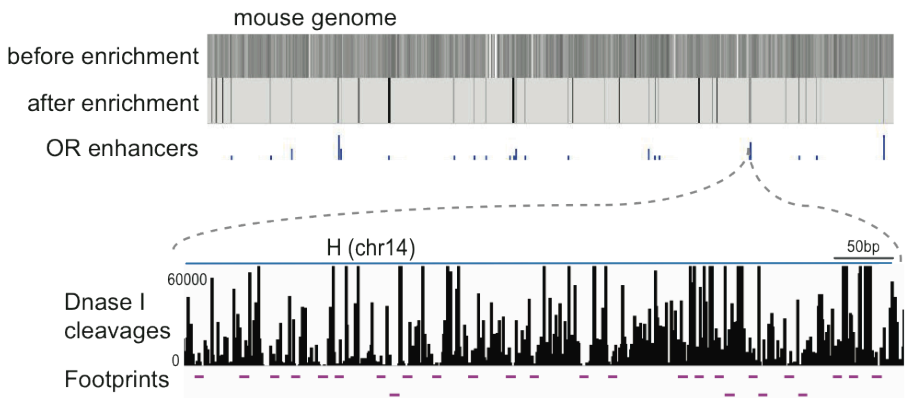**B**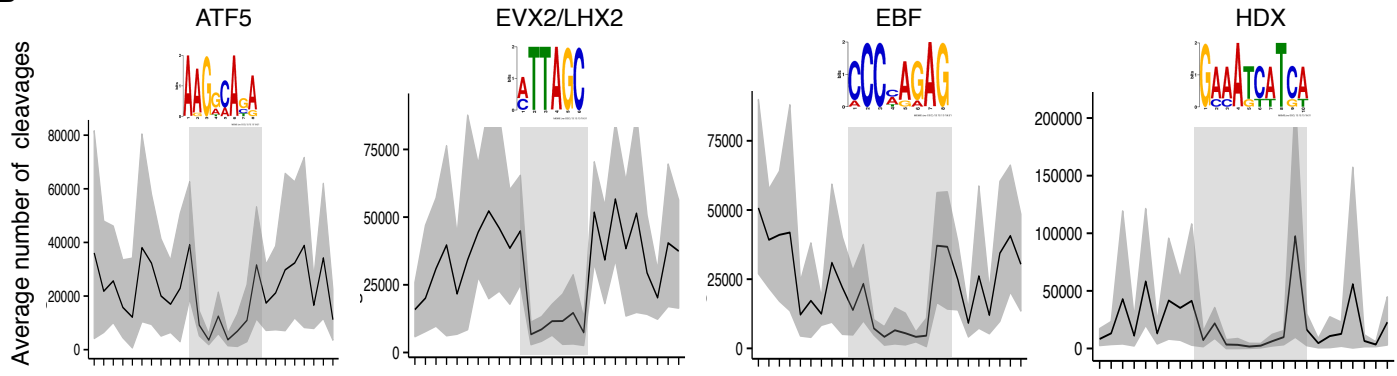**C**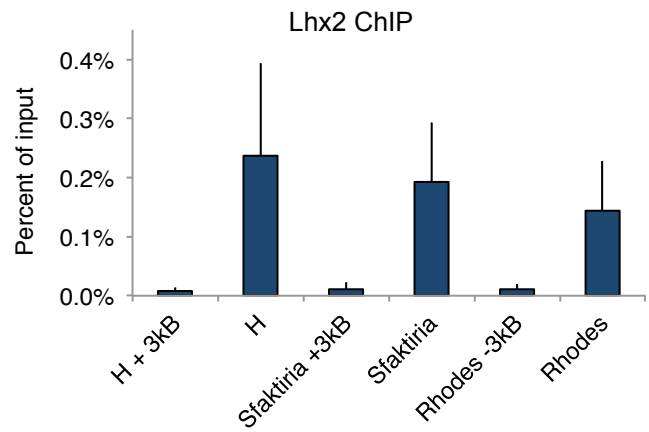**D**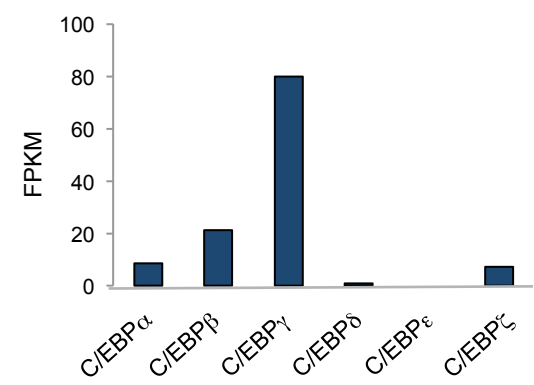

Supplement: NIHMS631164-supplement-8.pdf [file NIHMS631164-supplement-8.pdf]
